# Supplementary material
Source: PubMed Central journal article supplement (PMC4311797)
Supplement: pnas.1412192112.sapp.pdf [file pnas.1412192112.sapp.pdf]

BIOLOGICAL SCIENCES: GENETICS/CELLULAR AND DEVELOPMENTAL BIOLOGY

SUPPLEMENTAL DATA-TEXT

Uncoupling lifespan and healthspan in *Caenorhabditis elegans* longevity mutants

Ankita Bansal, Lihua J. Zhu, Kelvin Yen, and Heidi A. Tissenbaum<sup>a</sup>

## Supplemental text

### Determining the rate of healthspan decline

All of the healthspan data was compiled to determine the rate of decline in each of the health parameter. The details of the software and the computational method are described in detail in the methods section. Briefly, for each long-lived mutant, a regression curve was fit to each healthspan analysis data and the rate of decline in health was determined. Different statistical tests were used to determine a model that fit the changes in the parameters with age. This model was designed to take both the age and the genotype of the strain into consideration. Each of the long-lived strains was compared to wild type.

### **Healthspan Data Analysis: Homeostasis-Oxidative Stress**

For the oxidative stress healthspan dataset, the final selected model includes a cubic curve for age, genotype and their interactions. Wild type and *eat-2* mutants, show a similar decline in oxidative stress resistance capacity with age (**Table S1**). Although *daf-2* mutants are more resistant to oxidative stress and *ife-2* mutants are sensitive to oxidative stress than wild type, the rate of decline is similar. *clk-1* mutants have a slower rate of decline compared to wild type.

Considering the fact that worms with different genotypes have different life spans, the absolute age for worms with different genotypes may translate into different stages of life in terms of aging. Therefore, we also normalized the age using the ratio of median life span relative to wild type, and refer to this normalized age as “relative age”, which is used to replace age in the above model fitting. The final selected model for the oxidative stress healthspan dataset includes relative age, genotype and their interactions predicted by a quadratic equation. Consistently, for wild type, aging results in a decline in the ability to resist oxidative stress (**Table S2**). *ife-2* and *clk-1* mutants are more susceptible to oxidative stress than wild type, and their probability of

dying at older ages due to oxidative stress is similar to that of age-matched wild type worms. Interestingly, although *daf-2* mutants are more resistant to oxidative stress at Day 1, the rate of decline is significantly faster than wild type in an age matched population. This indicates that when normalized for lifespan, long-lived *daf-2* mutants lose their oxidative stress resistance capacity much faster than wild type. Similarly, *eat-2* mutants become more susceptible to oxidative stress than wild type.

### **Healthspan Data Analysis: Homeostasis-Heat stress**

Similar to oxidative stress, a best fit model was determined by a partial likelihood ratio test. The final selected model for the heat stress healthspan dataset was predicted by a cubic equation taking age, genotype and their interactions into consideration (**Table S3**). Compared to wild type, *clk-1*, *ife-2* and *eat-2* mutants are sensitive to heat stress at Day 1 while *daf-2* mutants are resistant to heat stress. With increasing age, there is no significant difference in the capacity of *clk-1*, *ife-2* and *daf-2* strains to maintain homeostasis in response to heat stress. However, *eat-2* mutants are resistant to heat stress in mid life but show a faster rate of decline than wild type when old.

Next, we used the normalized age to replace chronological age in the above model fitting. The final selected model in this case was a quadratic equation taking into consideration relative age, genotype and their interactions (**Table S4**). Compared to wild type, *clk-1* mutants are physiologically more sensitive to heat when young-mid life and slightly better when very old. *ife-2* and *daf-2* mutants respond similar to wild type initially but they lose this resistance at a much accelerated rate in the old age matched population. Compared to wild type, *eat-2* mutants lose capacity to withstand heat stress at a much faster rate with age.

### **Healthspan Data analysis: Movement in liquid media: Thrashing**

The thrashing healthspan dataset could be modeled on the basis of a cubic equation to include age, genotype and their interactions (**Table S5**). In all strains, as the animals aged, there was a significant decline in thrashing capacity. Compared to wild type, *daf-2* mutants thrash significantly less while *clk-1* mutants give a more complex scenario. *clk-1* mutants initially move similar to wild type with a higher rate of decline than wild type at younger ages and slower than wild type worms at older ages. *eat-2* and *ife-2* mutants initially thrash similar to wild type. However, the rate of decline is higher than wild type for *eat-2* mutants and slower for *ife-2* mutants when compared chronologically. This suggests that *daf-2*, *ife-2* and *clk-1* mutants improve the health chronologically.

Similar to previous parameters, we used normalized or physiological age, which replaced the “chronological age” in the above model fitting. The final selected model for the thrashing healthspan dataset was a quartic equation, which includes relative age, genotype and their interactions (**Table S6**). Aging resulted in a significant decline in thrashing and the effect is quartic for all genotypes (**Table S6**). Compared to wild type, *daf-2* mutants thrash significantly more initially, and the rate of decline is higher at younger ages and the difference decreases with advanced age, whereas. *clk-1* and *eat-2* mutants decline much faster and *ife-2* mutants decline at the same rate..

### **Healthspan Data analysis: Movement on solid media: distance travelled**

The final selected model for the distance travelled healthspan dataset was a quartic equation which includes age, genotype and their interactions (**Table S7**). Compared to wild type, *eat-2* mutants move significantly less distance initially and then declines faster; *clk-1* and *ife-2* mutants decline slower while *daf-2* mutants show a similar rate of decline (**Table S8**). This

indicates that chronologically *clk-1*, *ife-2* and *daf-2* mutants improve the movement capacity healthspan parameter.

Next we used normalized age that replaces age in the above model fitting. The final selected model for the thrashing dataset includes relative age up to a cubic term, genotype and their interactions (**Table S9**). Compared to wild type, *eat-2* mutants move significantly less and the rate of decline is much faster in the age-matched population. Both *ife-2* and *clk-1* mutants decline slower initially compared to wild type. However, this is followed by a faster rate of decline in *ife-2* mutants than wild type while *clk-1* mutants decline at a similar rate. *daf-2* mutants decline at the same rate as wild type (**Table S10**).

In summary, when comparing the rate of decline of the different healthspan parameters chronologically, the long-lived mutants seem to delay the rate of decline. However, taking the long lifespan of the mutants into account and recalculating the rate of decline gives conflicting results. When compared physiologically, these long-lived animals do not slow down the rate of decline in the healthspan parameters tested. This would result in an expansion of the frailty period indicating a detrimental cost to extending lifespan in the mutants tested in this study.

A.

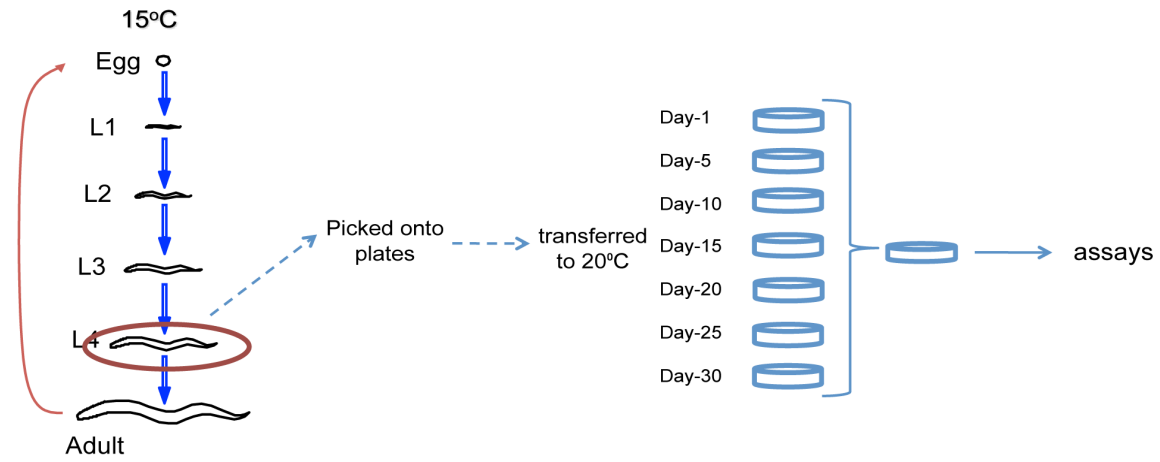

B.

| EXTERNAL STRESS RESPONSE    | INTERNAL STRESS RESPONSE                         | SARCOPENIA        | FEEDING RATE       |
|-----------------------------|--------------------------------------------------|-------------------|--------------------|
| Heat stress resistance      | Autofluorescence or accumulation of AGE products | Movement capacity | Pharyngeal pumping |
| Oxidative stress resistance |                                                  | Muscle integrity  |                    |

**Figure S1. Experimental design for measuring healthspan**

A: Protocol for cross-sectional study.

B. Different categories and assays used to quantify health.

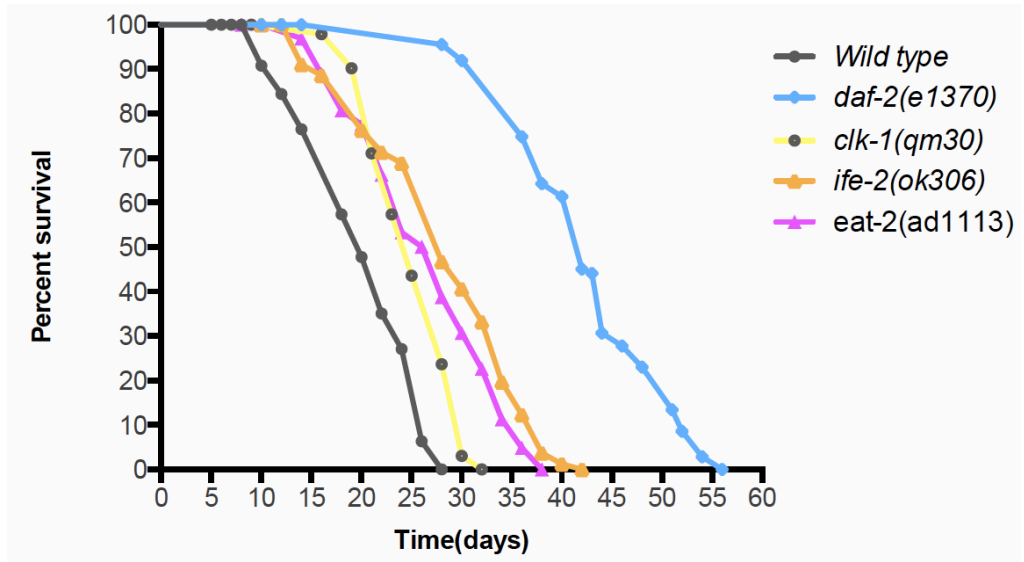

**Figure S2: Survival analyses of strains used in the study without FudR.**

This analysis was done without FudR at 20°C. The animals were transferred to fresh plates everyday initially and every 2-4 days after they stopped laying eggs. The worms were examined every two days for touch-provoked movement until death. The experiment was repeated twice and graph is the representative of two biological repeats

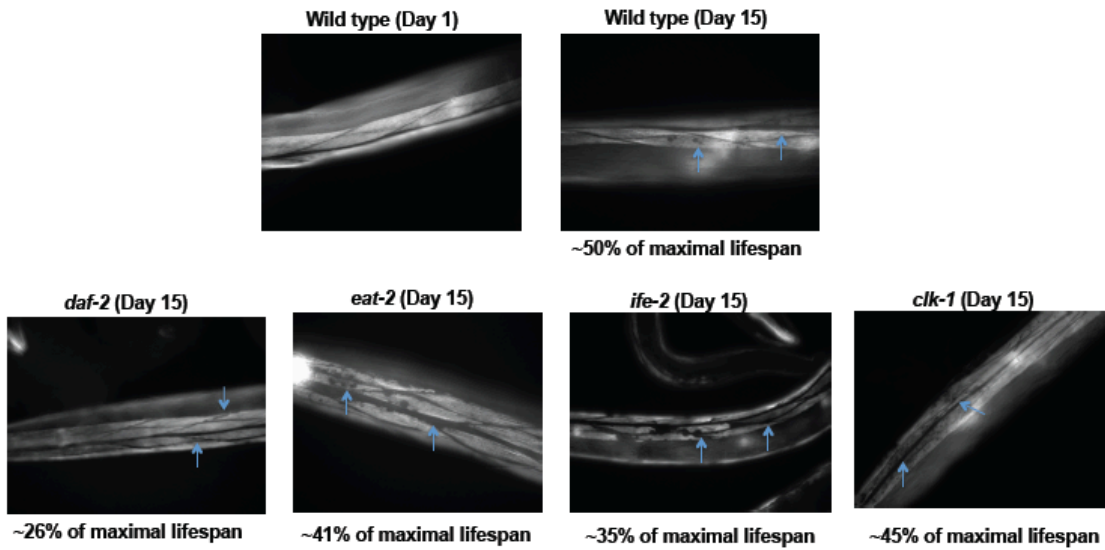

**Figure S3: Movement capacity of aging worms: Muscle architecture of animals at Day 15**

Phalloidin staining comparing Day 15 for wild type and the long-lived mutants. Wild type worm shows visible degradation at Day 15 (50%) of maximal lifespan (as indicated by the arrows). However, other long-lived mutants show degradation much earlier when normalized for their lifespan.



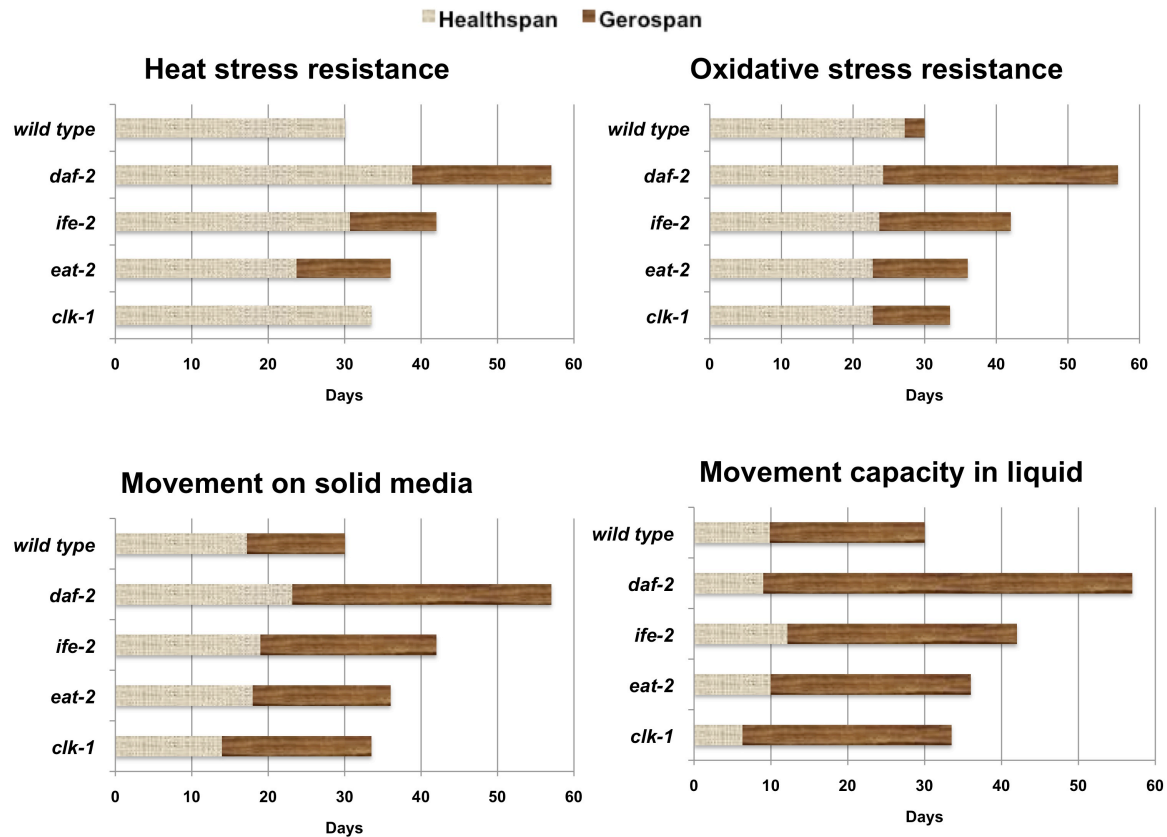

**Figure S4. Comparing healthspan vs gerospan in long-lived mutants chronologically (gerospan cut off is set at 30% of wild type functional capacity).**

Healthspan is defined as the period of time where the animal has greater than 30% of the maximal functional capacity of wild type (when the mutants have lost 70% of the functional capacity as compared to wild type). Gerospan is defined as the period of time where the animal has less than 30% of the maximal functional capacity of wild type. The mean values of number of days of healthspan and gerospan are plotted in the bar graphs.

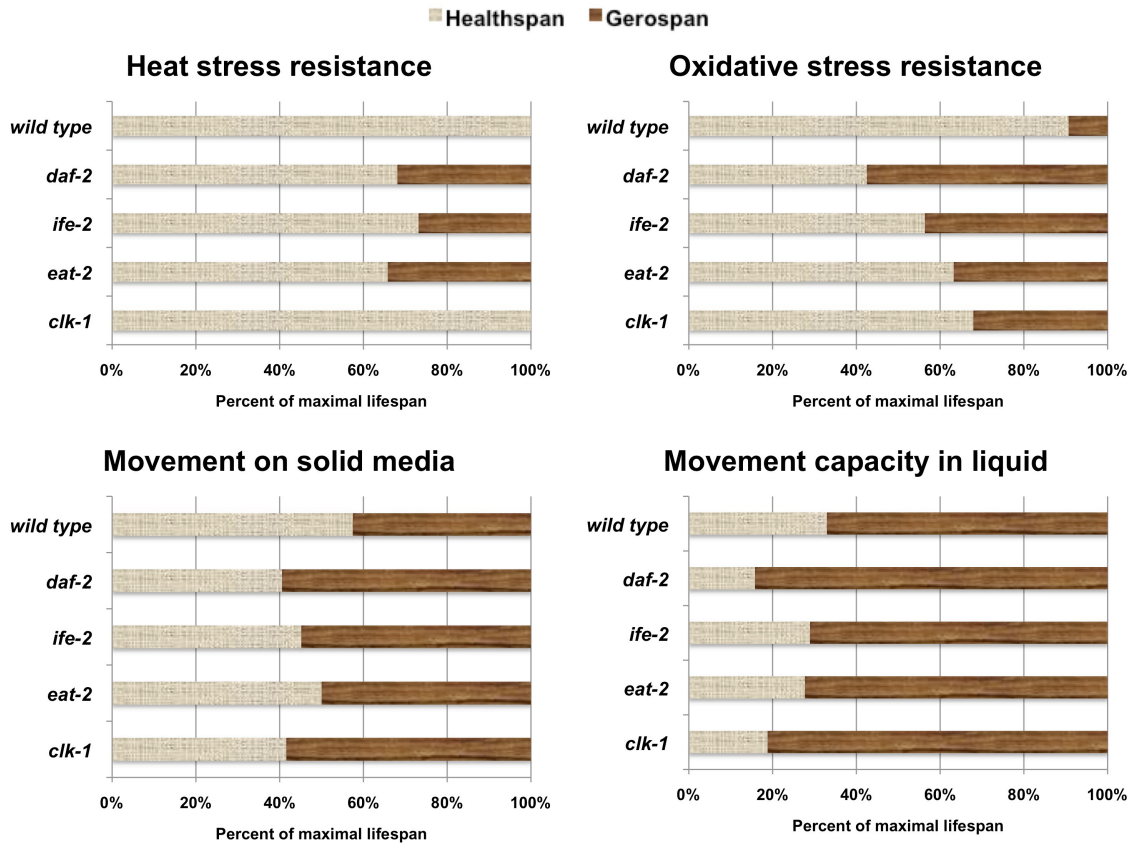

**Figure S5. Comparing healthspan vs gerospan in long-lived mutants physiologically (gerospan cut off is set at 30% of wild type functional capacity30%).**

Healthspan is defined as the period of time where the animal has greater than 30% of the maximal functional capacity of wild type (when the mutants have lost 70% of the functional capacity as compared to wild type). Gerospan is defined as the period of time where the animal has less than 30% of the maximal functional capacity of wild type. The fraction of the maximal lifespan spent in healthspan and gerospan was calculated by setting the maximal lifespan equal to 100%.

| <b>Variable</b>             | <b>Log(Hazard Ratio)</b> | <b>Hazard Ratio</b> | <b>P-value</b> | <b>95% confidence interval</b> |
|-----------------------------|--------------------------|---------------------|----------------|--------------------------------|
| <i>daf-2</i>                | -3.0110238               | 0.04924             | 0.00000<br>00  | (0.02739,0.0885<br>4)          |
| <i>ife-2</i>                | 0.5060030                | 1.65865             | 0.03174<br>85  | (1.04519,2.6321<br>6)          |
| Age.Linear                  | 0.2138678                | 1.23846             | 0.00070<br>97  | (1.09424,1.4016<br>8)          |
| <i>clk-1</i> :Age.Quadratic | -0.0190775               | 0.98110             | 0.01899<br>86  | (0.96559,0.9968<br>7)          |
| <i>clk-1</i> :Age.Cubic     | 0.0004956                | 1.00050             | 0.01686<br>32  | (1.00009,1.0009<br>0)          |

**Table S1. The final variables selected and their hazard ratio estimated from fitting Cox Proportional Hazards Model using absolute age for oxidative stress resistance.**

| <b>Variable</b>                      | <b>Log(Hazard Ratio)</b> | <b>Hazard Ratio</b> | <b>P-value</b> | <b>95% confidence interval</b> |
|--------------------------------------|--------------------------|---------------------|----------------|--------------------------------|
| <i>clk-1</i>                         | 0.602487                 | 1.82666             | 1.899e-03      | (1.24889,2.67171)              |
| <i>daf-2</i>                         | -3.322938                | 0.03605             | 0.000e+00      | (0.02192,0.05927)              |
| <i>ife-2</i>                         | 0.775743                 | 2.17221             | 1.548e-05      | (1.52795,3.08810)              |
| Relative.Age.Linear                  | 0.209459                 | 1.23301             | 9.226e-14      | (1.16692,1.30285)              |
| <i>daf-2</i> :Relative.Age.Linear    | 0.357051                 | 1.42911             | 3.775e-15      | (1.30741,1.56213)              |
| <i>eat-2</i> :Relative.Age.Linear    | 0.166664                 | 1.18136             | 2.529e-03      | (1.06024,1.31631)              |
| <i>daf-2</i> :Relative.Age.Quadratic | -0.006970                | 0.99305             | 7.857e-05      | (0.98962,0.99650)              |
| <i>eat-2</i> :Relative.Age.Quadratic | -0.006308                | 0.99371             | 3.161e-02      | (0.98801,0.99944)              |

**Table S2. The final variables selected and their hazard ratio estimated from fitting Cox Proportional Hazards Model using relative age for oxidative stress resistance.**

| <b>Variable</b>            | <b>Log<br/>(Hazard<br/>Ratio)</b> | <b>Hazard<br/>Ratio</b> | <b>P-value</b> | <b>95%<br/>confidence<br/>interval</b> |
|----------------------------|-----------------------------------|-------------------------|----------------|----------------------------------------|
| <i>clk-1</i>               | 0.515415                          | 1.67433                 | 4.898e-020     | (1.00230,2.7970)                       |
| <i>daf-2</i>               | -2.433932                         | 0.08769                 | 0e+00          | (0.05272,0.1459)                       |
| <i>eat-2</i>               | 1.554193                          | 4.73127                 | 2.082e-10      | (2.92962,7.6409)                       |
| <i>eat-2:Age</i>           | -0.600639                         | 0.4846                  | 5.661e-11      | (0.45827,0.6564)                       |
| <i>eat-2:Age,quadratic</i> | 0.060399                          | 1.06226                 | 1.031e-12      | (1.04476,1.08010)                      |
| <i>eat-2:Age,cubic</i>     | -0.001389                         | 0.99861                 | 7.624e-11      | (0.99819,0.9990)                       |

**Table S3. The final variables selected and their hazard ratio estimated from fitting Cox Proportional Hazards Model using absolute age for heat stress resistance.**

| <b>Variable</b>                      | <b>Log<br/>(Hazard<br/>Ratio)</b> | <b>Hazard<br/>Ratio</b> | <b>P-value</b> | <b>95% confidence<br/>interval</b> |
|--------------------------------------|-----------------------------------|-------------------------|----------------|------------------------------------|
| <i>clk-1</i>                         | 0.494660                          | 1.63994                 | 1.18e-02       | (1.11557,2.4108)                   |
| <i>daf-2</i>                         | -2.526621                         | 0.07993                 | 0e+00          | (0.05287,0.1208)                   |
| <i>eat-2</i>                         | 0.593881                          | 1.81100                 | 3.195e-03      | (1.22029,2.6877)                   |
| <i>ife-2</i>                         | 0.953624                          | 2.59510                 | 6.664e-08      | (1.83584,3.6684)                   |
| Relative age;quadratic               | 0.004841                          | 1.00485                 | 3.647e-06      | (1.00280,1.0069)                   |
| <i>clk-1</i> :relative age;linear    | 0.128444                          | 1.13706                 | 3.164e-03      | (1.04409,1.2383)                   |
| <i>ife-2</i> :relative age;linear    | -0.263570                         | 0.76830                 | 7.503e-13      | (0.71490,0.8257)                   |
| <i>clk-1</i> :relative age;quadratic | -0.05463                          | 0.99455                 | 5.440e-03      | (0.99073,0.9984)                   |
| <i>daf-2</i> :relative age;quadratic | 0.016049                          | 1.01618                 | 0e+00          | (1.101302,1.0193)                  |
| <i>eat-2</i> :relative age;quadratic | 0.017300                          | 1.01745                 | 3.886e-15      | (1.01307,1.0218)                   |
| <i>ife-2</i> :relative age;quadratic | 0.14461                           | 1.01457                 | 0e+00          | (1.101163,1.0175)                  |

**Table S4. The final variables selected and their hazard ratio estimated from fitting Cox Proportional Hazards Model using relative age for heat stress resistance.**

| <b>Variable</b>        | <b>Df</b> | <b>Sum<br/>e</b> | <b>Mean<br/>e</b> | <b>F-value</b> | <b>P-value</b> |
|------------------------|-----------|------------------|-------------------|----------------|----------------|
| Experiment             | 1         | 1519             | 1519              | 13.43          | 0.00026        |
| Age.Linear             | 1         | 592375           | 59237             | 5239.95        | <2e-16         |
| Age.Quadratic          | 1         | 134346           | 13434             | 1188.38        | <2e-16         |
| Age.Cubic              | 1         | 10190            | 10190             | 90.14          | <2e-16         |
| Genotype               | 4         | 9676             | 2419              | 21.4           | <2e-16         |
| Genotype:Age.Linear    | 4         | 7084             | 1771              | 15.67          | 1.9e-12        |
| Genotype:Age.Quadratic | 4         | 2464             | 616               | 5.45           | 0.00024        |
| Genotype:Age.Cubic     | 4         | 6597             | 1649              | 14.59          | 1.4e-11        |
| Residuals              | 1021      | 115424           | 113               |                |                |

**Table S5. Analysis of Variance Table using absolute age for movement in liquid.**

| <b>Variable</b>             | <b>Estimate</b> | <b>P-value</b> |
|-----------------------------|-----------------|----------------|
| Intercept                   | 87.726773       | 1.573e-172     |
| Experiment2                 | -2.485196       | 1.714e-04      |
| Age.Linear                  | -5.074239       | 1.046e-07      |
| Age.Cubic                   | 0.006149        | 5.405e-03      |
| <i>daf-2</i>                | -7.446643       | 2.256e-02      |
| <i>clk-1</i> :Age.Linear    | -8.025711       | 2.814e-09      |
| <i>daf-2</i> :Age.Linear    | -2.343741       | 2.775e-02      |
| <i>clk-1</i> :Age.Quadratic | 0.842777        | 1.502e-11      |
| <i>daf-2</i> :Age.Quadratic | 0.337242        | 2.603e-04      |
| <i>ife-2</i> :Age.Quadratic | 0.209932        | 2.848e-02      |
| <i>clk-1</i> :Age.Cubic     | -0.021271       | 1.451e-11      |
| <i>daf-2</i> :Age.Cubic     | -0.009188       | 4.892e-05      |
| <i>eat-2</i> :Age.Cubic     | -0.007618       | 1.486e-02      |
| <i>ife-2</i> :Age.Cubic     | -0.006584       | 4.565e-03      |

**Table S6. The final variables selected and their coefficients estimate using absolute age for movement in liquid.**



| <b>Variable</b>               | <b>Df</b> | <b>Sum Square</b> | <b>Mean Square</b> | <b>F-value</b> | <b>P-value</b> |
|-------------------------------|-----------|-------------------|--------------------|----------------|----------------|
| Experiment                    | 1         | 1519              | 1519               | 14.65          | 0.00014        |
| Relative.Age.Linear           | 1         | 580805            | 580805             | 5602.53        | <2e-16         |
| Relative.Age.Quadratic        | 1         | 115776            | 115776             | 1116.79        | <2e-16         |
| Relative.Age.Cubic            | 1         | 4251              | 4251               | 41.01          | 2.3e-10        |
| Relative.Age.Quartic          | 1         | 0                 | 0                  | 0.00           | 0.95918        |
| Genotype                      | 4         | 40054             | 10013              | 96.59          | <2e-16         |
| Genotype:Age.Linear           | 4         | 8292              | 2073               | 20.00          | 7.3e-16        |
| Genotype:Age.Quadratic        | 4         | 3467              | 867                | 8.36           | 1.2e-06        |
| Genotype:Relative.Age.Cubic   | 4         | 13429             | 3357               | 32.39          | <2e-16         |
| Genotype:Relative.Age.Quartic | 4         | 6755              | 1689               | 16.29          | 6.1e-13        |
| Residuals                     | 1016      | 105327            | 104                |                |                |

**Table S7. Analysis of Variance Table using Relative Age for movement in liquid**

| <b>Variable</b>                      | <b>Estimate</b> | <b>P-value</b> |
|--------------------------------------|-----------------|----------------|
| Intercept                            | 78.086479       | 2.065e-109     |
| Experiment2                          | -2.506825       | 7.601e-05      |
| Relative.Age.Quadratic               | -1.700208       | 2.961e-07      |
| Relative.Age.Cubic                   | 0.104801        | 9.838e-08      |
| Relative.Age.Quartic                 | -0.001904       | 4.413e-07      |
| <i>clk-1</i>                         | 18.359689       | 2.994e-05      |
| <i>daf-2</i>                         | 7.996943        | 3.999e-02      |
| <i>clk-1</i> :Relative.Age.Linear    | -29.495306      | 8.263e-19      |
| <i>daf-2</i> :Relative.Age.Linear    | -27.134624      | 3.004e-21      |
| <i>eat-2</i> :Relative.Age.Linear    | -10.588568      | 2.380e-03      |
| <i>clk-1</i> :Relative.Age.Quadratic | 5.033247        | 6.292e-14      |
| <i>daf-2</i> :Relative.Age.Quadratic | 4.698633        | 4.648e-17      |
| <i>clk-1</i> :Relative.Age.Cubic     | -0.300790       | 1.221e-09      |
| <i>daf-2</i> :Relative.Age.Cubic     | -0.283921       | 1.929e-12      |
| <i>clk-1</i> :Relative.Age.Quartic   | 0.006016        | 6.717e-07      |
| <i>daf-2</i> :Relative.Age.Quartic   | 0.005786        | 3.082e-09      |

**Table S8. The final variables selected and their coefficients estimate from fitting linear model using relative age for movement in liquid.**

| <b>Variable</b>             | <b>Df</b> | <b>Sum Square</b> | <b>Mean Square</b> | <b>F-value</b> | <b>P-value</b> |
|-----------------------------|-----------|-------------------|--------------------|----------------|----------------|
| Experiment                  | 1         | 6.36e+07          | 6.36e+07           | 53.26          | 5.8e-13        |
| Age; linear                 | 1         | 5.47e+09          | 5.47e+09           | 4575.62        | <2e-16         |
| Age.Quadratic               | 1         | 2.52e+08          | 2.52e+08           | 210.93         | <2e-16         |
| Age.Cubic                   | 1         | 6.32e+07          | 6.32e+07           | 52.87          | 7.0e-13        |
| Age.quartic                 | 1         | 4.49e+07          | 4.49e+07           | 37.58          | 1.3e-09        |
| Genotype                    | 4         | 2.30e+08          | 5.75e+07           | 48.08          | <2e-16         |
| Genotype:Age.Linear         | 4         | 3.78e+07          | 9.46e+06           | 7.91           | 2.8e-06        |
| Genotype:Age.Quadratic      | 4         | 7.23e+07          | 1.81e+07           | 15.12          | 5.1e-12        |
| Genotype:Relative.Age.Cubic | 4         | 2.75e+07          | 6.88e+06           | 5.76           | 0.00014        |
| Residuals                   | 1030      | 1.23e+09          | 1.20e+06           |                |                |

**Table S9. Analysis of Variance Table using absolute age for distance travelled experiment**

| <b>Variable</b>             | <b>Estimate</b> | <b>P-value</b> |
|-----------------------------|-----------------|----------------|
| Intercept                   | 7.226e+03       | 8.548e-125     |
| Experiment2                 | -5.031e+02      | 1.794e=13      |
| Age.Quadratic               | -4.767e+01      | 9.709e-07      |
| Age.Cubic                   | 1.515e+00       | 1.56e-06       |
| Age.Quartic                 | -1.025e-01      | 1.066e-02      |
| <i>eat-2</i>                | -1.243e+03      | 7.596e-04      |
| <i>clk-1</i> :Age.Linear    | -4.320e+02      | 1.637e-03      |
| <i>eat-2</i> :Age.Linear    | 3.169e+02       | 2.167e-02      |
| <i>ife-2</i> :Age.Linear    | -2.926e+02      | 1.403e-02      |
| <i>clk-1</i> :Age.Quadratic | 3.651e+01       | 4.068e-02      |
| <i>ife-2</i> :Age.Quadratic | -2.926e+02      | 1.403e-02      |
| <i>clk-1</i> :Age.Cubic     | -7.390e-01      | 2.149e-02      |
| <i>ife-2</i> :Age.Cubic     | -6.215e-01      | 1.459e-02      |

**Table S10. The final variables selected and their coefficients estimate using absolute age for distance travelled**

| <b>Variable</b>                 | <b>Df</b> | <b>Sum Square</b> | <b>Mean Square</b> | <b>F-value</b> | <b>P-value</b> |
|---------------------------------|-----------|-------------------|--------------------|----------------|----------------|
| Experiment                      | 1         | 6.36e+07          | 6.36e+07           | 52.97          | 6.7e-13        |
| Relative Age.Linear             | 1         | 5.47e+09          | 5.47e+09           | 4550.26        | <2e-16         |
| Relative Age.Quadratic          | 1         | 1.67e+08          | 1.67e+08           | 138.69         | <2e-16         |
| Relative Age.Cubic              | 1         | 8.73e+07          | 8.73e+07           | 72.65          | <2e-16         |
| Genotype                        | 4         | 3.12e+08          | 7.80e+07           | 64.95          | <2e-16         |
| Genotype:Relative Age.Linear    | 4         | 2.05e+07          | 5.12e+06           | 4.26           | 0.002          |
| Genotype:Relative Age.Quadratic | 4         | 9.65e+07          | 2.41e+07           | 20.08          | 0.00024        |
| Genotype:Relative Age.Cubic     | 4         | 3.79e+07          | 9.47e+06           | 7.88           | 6.2e-16        |
| Residuals                       | 1031      | 1.24e+09          | 1.20e+06           |                | 3e-06          |

**Table S11: Analysis of Variance table using relative age for distance travelled.**

| <b>Variable</b>                      | <b>Estimate</b> | <b>P-value</b> |
|--------------------------------------|-----------------|----------------|
| Intercept                            | 7278.1400       | 3.169e-126     |
| Experiment2                          | -502.9616       | 2.107e-13      |
| Relative Age.quadratic               | -38.9708        | 1.944e-05      |
| Relative Age.Cubic                   | 0.9826          | 2.135e-05      |
| <i>eat-2</i>                         | -1242.9895      | 7.878e-04      |
| <i>clk-1</i> ;relative age;linear    | -540.2387       | 7.958e-04      |
| <i>eat-2</i> ;relative age;linear    | 503.9392        | 3.451e-03      |
| <i>ife-2</i> ;relative age;linear    | -497.2107       | 1.561e-04      |
| <i>eat-2</i> ;relative age;quadratic | -85.2408        | 5.194e-05      |
| <i>ife-2</i> ;relative age;quadratic | 31.3118         | 1.131e-02      |
| <i>eat-2</i> ;relative age;cubic     | 3.1968          | 1.265e-05      |

**Table S12. The final variables selected and their coefficients estimate using relative age for distance travelled.**
